# Supplementary material for: TGF-beta Modulates the Integrity of the Blood Brain Barrier in Vitro, and is Associated with Metabolic Alterations in Pericytes
Source: Preprints.org preprint supplement (doi:10.20944/preprints202212.0342.v1), 2022-12-20
Supplement: Supplementary file 1 [file supplementary]

Archive with 5 entries (5 files):
- Suppl Material/Supplementary Figure 1.pdf
- Suppl Material/Supplementary Figure 2.pdf
- Suppl Material/Supplementary Table 1.pdf
- Suppl Material/Supplementary Table 2.pdf
- Suppl Material/SupplementaryTable_3.pdf
