# Supplementary material for: TGF-beta Modulates the Integrity of the Blood Brain Barrier in Vitro, and is Associated with Metabolic Alterations in Pericytes
Source: Preprints.org preprint supplement (doi:10.20944/preprints202212.0342.v1), 2022-12-20
Supplement: Supplementary file 1 [file supplementary › Suppl Material/Supplementary Figure 1.pdf]

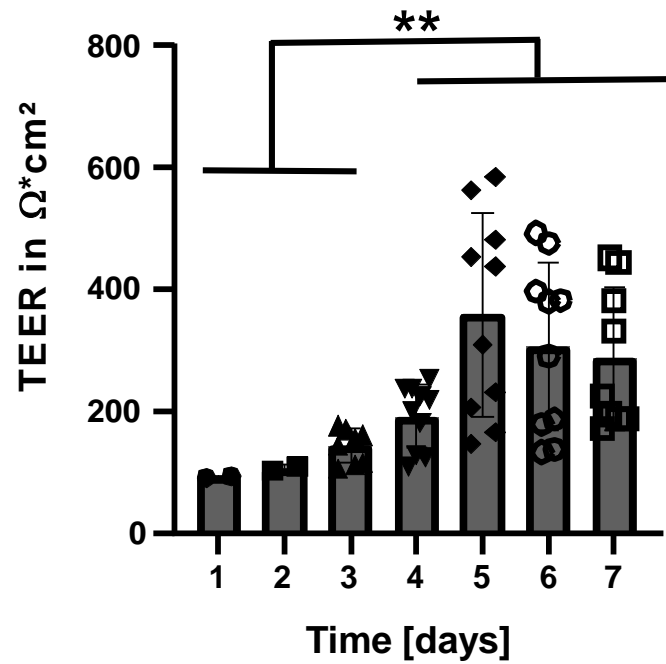

**Supplementary Figure 1:** PBMVEC and HBCPs were seeded on membranes as described in the Material and Methods part. The tightness of the barrier that was generated was determined by measuring TEER. A stable and dense barrier was generated 5 days after coculture (n=3, two to six replicates each, SD).
