# Supplementary material for: TGF-beta Modulates the Integrity of the Blood Brain Barrier in Vitro, and is Associated with Metabolic Alterations in Pericytes
Source: Preprints.org preprint supplement (doi:10.20944/preprints202212.0342.v1), 2022-12-20
Supplement: Supplementary file 1 [file supplementary › Suppl Material/Supplementary Table 1.pdf]

**Supplementary Table 1:** Upregulated genes with a log fold change of > 2 in TGF- $\beta$  treated HBVP

| Symbol     | Gene Name                                            | Log fold change | Functions                                                                                                                                                                                                                                                                                                                                                                                                         | Associated with                                                                                | Reference                                                                                                                      |
|------------|------------------------------------------------------|-----------------|-------------------------------------------------------------------------------------------------------------------------------------------------------------------------------------------------------------------------------------------------------------------------------------------------------------------------------------------------------------------------------------------------------------------|------------------------------------------------------------------------------------------------|--------------------------------------------------------------------------------------------------------------------------------|
| FOXS1      | forkhead box S1                                      | 8.25 $\uparrow$ | <ul style="list-style-type: none"> <li>• Promotes cell proliferation and EMT in gastric cancer.</li> <li>• TGF<math>\beta</math>-induced FOXS1 controls EMT.</li> <li>• Forkhead proteins required for brain pericyte differentiation, development and maintenance of the BBB.</li> </ul>                                                                                                                         | TGF- $\beta$<br>proliferation<br>cell motility<br>EMT<br>Cancer<br>pericyte development<br>BBB | Sci Rep. 2019 (1):5281.<br>doi: 10.1038/s41598-019-41717-w<br>Hepatology Comm. 2022, 6 (5): 1157<br>Dev Cell 2015, 6;34(1): 19 |
| ESM1       | endothelial cell-specific molecule 1 /Endocan        | 7.60 $\uparrow$ | <ul style="list-style-type: none"> <li>• Specific biomarker of tip cells during neo-angiogenesis.</li> <li>• Expression increased by pro-angiogenic growth factors.</li> <li>• Role in endothelium-dependent pathological disorders.</li> <li>• Secreted proteoglycan that has been shown to indicate angiogenic activity.</li> <li>• Putative indicator of new blood vessels that are not functional.</li> </ul> | angiogenesis<br>cancer<br>BBB (?)                                                              | Front Oncol. 2021;11: 687120.<br>Immunol Methods 2013;398-399:27                                                               |
| COMP5/TSP5 | cartilage oligomeric matrix protein/thrombospondin 5 | 7.20 $\uparrow$ | <ul style="list-style-type: none"> <li>• Extracellular matrix protein.</li> <li>• Member of the TSP family.</li> <li>• Cell adhesion.</li> <li>• Induced by TGF-<math>\beta</math></li> <li>• Remodeling of the tumor microenvironment</li> </ul>                                                                                                                                                                 | cell motility<br>cancer<br>angiogenesis<br>TGF- $\beta$                                        | JBC 2005, 280;(38): 32655.<br>Arteriosclerosis, Thrombosis, and Vascular Biology. 2001;21:47<br>Vessel Plus. 2018;2:30.        |
| GPR183     | G protein-coupled receptor 183                       | 7.13 $\uparrow$ | <ul style="list-style-type: none"> <li>• Regulates migration of astrocytes.</li> <li>• Communication between astrocytes and macrophages.</li> <li>• Suggested to be involved in the regulation of the neuro-vascular unit.</li> <li>• G protein coupled receptors are essential for the integrity of the BBB.</li> </ul>                                                                                          | cell motility<br>BBB                                                                           | Glia 63:341-351(2015)<br>Front Cell Neurosci. 2020;14:139.                                                                     |
| TSPAN2     | tetraspanin 2                                        | 6.04 $\uparrow$ | <ul style="list-style-type: none"> <li>• Forms large transmembrane protein networks.</li> <li>• Regulate cell motility and invasion.</li> <li>• Regulates cell/ECM adhesion, cell/cell interaction and migration.</li> <li>• Involved in the progression of the lung tumor metastasis.</li> </ul>                                                                                                                 | cell motility<br>cancer                                                                        | J Cell Biol (2001) 155;(7): 1103<br>Biochem Soc Trans. 2017;45(2):465-475.                                                     |

|            |                                                     |        |                                                                                                                                                                                                                                                                                                                                                                                                                                       |                                                       |                                                                                                                                                                                        |
|------------|-----------------------------------------------------|--------|---------------------------------------------------------------------------------------------------------------------------------------------------------------------------------------------------------------------------------------------------------------------------------------------------------------------------------------------------------------------------------------------------------------------------------------|-------------------------------------------------------|----------------------------------------------------------------------------------------------------------------------------------------------------------------------------------------|
| NOX4       | NADPH oxidase 4                                     | 5.99 ↑ | <ul style="list-style-type: none"> <li>Regulates glycolysis, glucose &amp; fatty acid oxidation in heart.</li> <li>Overexpression predicts poor prognosis and promotes tumor progression in human colorectal cancer.</li> <li>Upregulation of NOX4 by TGF-beta is required for its pro-apoptotic activity in hepatocytes.</li> <li>Inhibition of NOX4/ROS suppresses neuronal and BBB injury</li> </ul>                               | metabolism<br>cancer<br>TGF-β<br>BBB                  | JCI Insight 2017;2: e96184<br>Oncotarget. 2017;8(20):33586-33600<br>J Hepatol 2008, 49(6):965<br>Front. Cell. Neurosci., 2020, Sect. Cell. Neuropath.doi.org/10.3389/fncel.2020.578060 |
| ELN        | elastin                                             | 5.95 ↑ | <ul style="list-style-type: none"> <li>ECM protein that lends elasticity and resilience to tissues such as the arteries.</li> <li>TGF-β is involved in regulation of elastin deposition during fetal development, tissue repair, and in pathological conditions.</li> <li>In many malignancies, the remodeled ECM expresses high levels of the elastin which may have either positive or negative effects on tumor growth.</li> </ul> | cell motility<br>TGF-β<br>cancer                      | Lab Invest. 1992;66(5):580-8<br>Tumor Microenvironment 2020:<br>Extracellular Matrix Components – Part B: 1                                                                            |
| AMIGO2     | adhesion molecule with Ig-like domain 2             | 5.49 ↑ | <ul style="list-style-type: none"> <li>Controls cell survival and angiogenesis via Akt activation.</li> <li>Loss of AMIGO2 in ECs led to apoptosis and inhibition of angiogenesis with Akt inactivation.</li> <li>Extracellular vesicle-derived AMIGO2 stimulates endothelial cell adhesion to cancer cells.</li> <li>Most upregulated gene in TGFβ-treated human embryonic palatal mesenchymal cells.</li> </ul>                     | angiogenesis<br>cancer<br>metastasis<br>TGF-β<br>EMT? | J Cell Biol (2015) 211 (3): 619.<br>Scientific Reports 2020,12, Art.No.: 792<br>Front Physiol. 2012;3:85.                                                                              |
| AC112721.1 | uncharacterized                                     | 5.30 ↑ | <ul style="list-style-type: none"> <li>Autophagy-related lncRNA.</li> <li>Associated with pathways closely related to tumor metastasis and invasion (cytoskeleton regulation, gap junctions, focal adhesion, ECM receptor interaction)</li> </ul>                                                                                                                                                                                     | autophagy<br>cell motility<br>cancer                  | Front Oncol. 2021;11:647236.<br>doi:10.3389/fonc.2021.647236                                                                                                                           |
| CHRNA9     | cholinergic receptor, nicotinic, alpha 9 (neuronal) | 5.22 ↑ | <ul style="list-style-type: none"> <li>Member of the ligand-gated ionic channel family and nicotinic acetylcholine receptor gene super-family</li> <li>Involved in ROS regulation.</li> <li>Important for lung tumor carcinogenesis.</li> </ul>                                                                                                                                                                                       | ROS regulation<br>cancer                              | Int. J. Mol. Sci. 2020, 21(14): 4918<br>J Exp Clin Med 2011, 3(6): 246                                                                                                                 |
| PRR5L      | proline rich 5 like                                 | 4.94 ↑ | <ul style="list-style-type: none"> <li>modulates mTORC2 activity which is known to regulate glucose uptake, glycolysis and the pentose phosphate pathway (PPP).</li> </ul>                                                                                                                                                                                                                                                            | metabolism                                            | Nature Cell Biology 2012, 14:686                                                                                                                                                       |
| EGR2       | early growth response 2                             | 4.92 ↑ | <ul style="list-style-type: none"> <li>Regulation of cholesterol/lipid biosynthetic genes</li> <li>during peripheral nerve myelination.</li> </ul>                                                                                                                                                                                                                                                                                    | metabolism<br>senescence                              | J Neurochem 2005;93:737<br>Aging Cell. 2021, 20(3):e13318                                                                                                                              |

|               |                                          |        |                                                                                                                                                                                                                                                                                                              |                                                             |                                                                                                                                                              |
|---------------|------------------------------------------|--------|--------------------------------------------------------------------------------------------------------------------------------------------------------------------------------------------------------------------------------------------------------------------------------------------------------------|-------------------------------------------------------------|--------------------------------------------------------------------------------------------------------------------------------------------------------------|
|               |                                          |        | <ul style="list-style-type: none"> <li>• Regulator of senescence.</li> </ul>                                                                                                                                                                                                                                 |                                                             |                                                                                                                                                              |
| MMP-10        | matrix metallo-peptidase 10              | 4.81 ↑ | <ul style="list-style-type: none"> <li>• Upregulated by TGF-β.</li> <li>• Promotes migration, invasion and angiogenesis.</li> <li>• In the brain, MMPs are critical for BBB integrity.</li> </ul>                                                                                                            | cell motility<br>angiogenesis<br>TGF-β<br>Cancer<br>BBB (?) | PLoS One 2011, 6(10):e25438<br>Front Oncol. 2019, 9:1370.<br>doi:10.3389/fonc.2019.0137<br>J Cereb Blood Flow Metab. 2016;36(9):1481                         |
| RP11-492E3.2  | non coding RNA                           | 4.79 ↑ | <ul style="list-style-type: none"> <li>• Exosomal antisense ncRNA.</li> </ul>                                                                                                                                                                                                                                |                                                             | lncRNAfunc: Functional analysis of Long non-coding RNAs - Search (uth.edu)                                                                                   |
| ADAM19        | ADAM metallo-peptidase domain 19         | 4.53 ↑ | <ul style="list-style-type: none"> <li>• Endopeptidase that cleaves ECM proteins.</li> <li>• Protective biomarker in human prostate cancer.</li> <li>• Target for metabolic syndrome in human and mice.</li> <li>• Regulated by TGF-β.</li> </ul>                                                            | cell motility<br>cancer<br>metabolism<br>TGF-β              | Curr Pharm Des. 2009;15(20):2336<br>BMC Cancer 2016, 16: Art.No. 15<br>Mediators of Inflammation 2017, Art.No.: 7281986                                      |
| NXPH4         | neurexophilin 4                          | 4.47 ↑ | <ul style="list-style-type: none"> <li>• Secreted neuropeptide-like glycoproteins.</li> <li>• Regulates specific synapse function.</li> <li>• Exerts co-receptor function for TGF-β on the membrane of cancer cells and enhances responses to TGF-β</li> </ul>                                               | cancer<br>TGF- β                                            | eLife 2019;8:e46773<br>Carcinogenesis 2011, 32(4): 613                                                                                                       |
| IL11          | interleukin 11                           | 4.43 ↑ | <ul style="list-style-type: none"> <li>• TGF-β1 stimulates IL11 expression in epithelial cells and fibroblasts.</li> <li>• Stimulates fibrosis which also needs activated pericytes.</li> <li>• Stimulate survival and proliferation of cancer cells alongside angiogenesis of the primary tumor.</li> </ul> | cancer<br>TGF- β<br>proliferation<br>angiogenesis           | Exp Mol Med 2020, 52: 1871<br>Front. Cell Dev. Biol.2020, 14: 1<br>J Clin Periodontol. 2006, 33(3):165<br>Cytokine & Growth Factor Reviews 2015, 26 (5): 489 |
| RP11-509E16.1 | lncRNA                                   | 4.33 ↑ | <ul style="list-style-type: none"> <li>• Involved in T cell differentiation.</li> <li>• Triggers the dissemination of colorectal cancer cells via upregulation of Zeb1.</li> </ul>                                                                                                                           | cancer<br>EMT                                               | Nature Comm 2015, 6:6932; doi: 10.1038/ncomms7932<br>Mol Cancer. 2019 Apr 13;18(1):87                                                                        |
| SAMD11        | sterile alpha motif domain containing 11 | 4.32 ↑ | <ul style="list-style-type: none"> <li>• Predicted to enable histone binding activity.</li> <li>• Protein domain specific binding activity.</li> <li>• Protein self-association.</li> <li>• Suggested to be involved in cervical cancer.</li> </ul>                                                          | cancer                                                      | SAMD11 Gene - GeneCards<br>Clin Exp Pharmacol Physiol. 2022, 49(1):175                                                                                       |
| DIO3          | deiodinase, iodothyronine, type III      | 4.24 ↑ | <ul style="list-style-type: none"> <li>• Crucial role in human carcinogenesis.</li> <li>• Role in the regulation of cell proliferation in several neoplastic contexts.</li> <li>• Expression induced by TGF-β.</li> </ul>                                                                                    | cancer<br>proliferation<br>TGF-β                            | Minerva Endocrinol. 2012, 37(4):315-27<br>Oncogene 2021, 40: 6248<br>Molecular Endocrinology 2005, 19(12): 3126                                              |
| PTH1H         | parathyroid hormone-like hormone         | 4.23 ↑ | <ul style="list-style-type: none"> <li>• Autocrine/paracrine ligand, regulates cell differentiation and proliferation.</li> <li>• Possible role in angiogenesis.</li> <li>• Important in normal and abnormal calcium metabolism.</li> <li>• TGF-β stimulates PTH1H and osteolytic metastases.</li> </ul>     | proliferation<br>angiogenesis<br>cancer<br>TGF-β            | Entry - *168470 - PARATHYROID HORMONE-LIKE HORMONE; PTH1H - OMIM<br>J Biol Chem 2002, 277(27):24571                                                          |

|             |                                                                       |        |                                                                                                                                                                                                                                                                                                                                                                                                                                  |                                                                                                                           |                                                                                                                                                                                                                         |
|-------------|-----------------------------------------------------------------------|--------|----------------------------------------------------------------------------------------------------------------------------------------------------------------------------------------------------------------------------------------------------------------------------------------------------------------------------------------------------------------------------------------------------------------------------------|---------------------------------------------------------------------------------------------------------------------------|-------------------------------------------------------------------------------------------------------------------------------------------------------------------------------------------------------------------------|
| BMF         | Bcl2 modifying factor                                                 | 4.16 ↑ | <ul style="list-style-type: none"> <li>• BCL2 protein family.</li> <li>• Binds BCL2 proteins and function as an apoptotic activator.</li> <li>• Might act as a sentinel for stress-impaired protein translation machinery.</li> <li>• Upregulated by TGF-β.</li> </ul>                                                                                                                                                           | apoptosis<br>translation<br>cancer<br>TGF-β                                                                               | Cell Death Differ. 2010, 17 (11): 1672.<br>Oncogene 2007, 26(7): 970                                                                                                                                                    |
| SEMA7A      | semaphorin 7A                                                         | 4.15 ↑ | <ul style="list-style-type: none"> <li>• Involvement in migration and differentiation of neurons.</li> <li>• Promotes axon outgrowth.</li> <li>• Neuronal guidance protein.</li> <li>• Promotes chemokine-driven dendritic cell migration.</li> <li>• Plays a critical role in TGF-β-induced pulmonary fibrosis.</li> <li>• Up-regulated in breast cancer and promotes macrophage production of angiogenic molecules.</li> </ul> | cell motility<br>cartilage intermediate<br>layer protein,<br>nucleotide<br>pyrophosphohydrolase<br>cancer<br>angiogenesis | Immunol Res. 2014, 58(1):159<br>Immunol Res. 2013, 57(1-3):81<br>J Exp Med 2007, 204(5): 1083<br>J Immunol 2014, 192 (1 Suppl.) 138.34                                                                                  |
| AC020571.3  | lncRNA                                                                | 4.11 ↑ | <ul style="list-style-type: none"> <li>• Unknown function.</li> </ul>                                                                                                                                                                                                                                                                                                                                                            |                                                                                                                           |                                                                                                                                                                                                                         |
| LBH         | limb bud and heart development                                        | 3.94 ↑ | <ul style="list-style-type: none"> <li>• Functions as a Tumor Suppressor of Nasopharyngeal carcinoma by inducing G1/S cell cycle arrest.</li> <li>• Mediates proliferation, fibroblast-to-myofibroblast transition and EMT-like processes in cardiac fibro-blasts.</li> <li>• TGF-β induces LBH expression in nasopharyngeal epithelial cells.</li> </ul>                                                                        | proliferation<br>cancer<br>EMT                                                                                            | Scientific Rep. 2015, 5, Art.No. 7626<br>Mol Cell Biol 2021, 476(7): doi.org/<br>10.1007/s11010-021-04111-7                                                                                                             |
| RP1-27K12.4 | Lnc RNA                                                               | 3.91 ↑ | <ul style="list-style-type: none"> <li>• Unknown function</li> </ul>                                                                                                                                                                                                                                                                                                                                                             |                                                                                                                           |                                                                                                                                                                                                                         |
| ALQX5AP     | Arachidonate 5-lipoxygenase-activating protein                        | 3.87 ↑ | <ul style="list-style-type: none"> <li>• Arachidonate binding protein.</li> <li>• Essential for cellular leukotriene (LT) synthesis</li> <li>• Predicts poor prognosis by enhancing M2 macrophage polarization and immunosuppression in ovarian cancer microenvironment.</li> </ul>                                                                                                                                              | metabolism<br>cancer                                                                                                      | FEBS Lett. 1993, 8, 318(3):277<br>Front. Oncol. 2021,Sec. Gynecological<br>Oncology, doi.org/10.3389/fonc.2021.<br>675104                                                                                               |
| CLIP        | cartilage intermediate layer protein, nucleotide pyrophosphohydrolase | 3.66 ↑ | <ul style="list-style-type: none"> <li>• Matrix protein that resides in the middle of human articular cartilage.</li> <li>• Regulates the extracellular microenvironment of the NVU.</li> <li>• Suppresses TGF-β signaling in cardiac fibroblasts.</li> </ul>                                                                                                                                                                    | TGF-β                                                                                                                     | Int J Mol Med 2021, 47(2):475<br><u>Int J Gerontology</u> 2017, 11(2): 67                                                                                                                                               |
| PLEK2       | Pleckstrin 2                                                          | 3.61 ↑ | <ul style="list-style-type: none"> <li>• Regulates cell protrusions such as lamellipodia and filopodia.</li> <li>• Involved in tumorigenesis and metastasis.</li> </ul>                                                                                                                                                                                                                                                          | cell motility<br>cancer<br>TGF-β                                                                                          | Front. Cell Dev. Biol., 2021<br>Sec. Molecular and Cellular Oncology<br><a href="https://doi.org/10.3389/fcell.2021.768238">https://doi.org/10.3389/fcell.2021.768238</a><br>Cell Death & Disease 2021,12, Art.NO.: 901 |

|          |                                                                   |                 |                                                                                                                                                                                                                                                                                                                                                                                                                                                                                                |                                                                     |                                                                                     |
|----------|-------------------------------------------------------------------|-----------------|------------------------------------------------------------------------------------------------------------------------------------------------------------------------------------------------------------------------------------------------------------------------------------------------------------------------------------------------------------------------------------------------------------------------------------------------------------------------------------------------|---------------------------------------------------------------------|-------------------------------------------------------------------------------------|
|          |                                                                   |                 | <ul style="list-style-type: none"> <li>• TGF-<math>\beta</math>-induced PLEK2 promotes metastasis and chemoresistance in oesophageal squamous cell carcinoma.</li> </ul>                                                                                                                                                                                                                                                                                                                       |                                                                     |                                                                                     |
| NEDD9    | neural precursor cell expressed, developmentally down-regulated 9 | 3.60 $\uparrow$ | <ul style="list-style-type: none"> <li>• Docking protein which plays a central coordinating role in cell adhesion.</li> <li>• Functions in transmitting growth control signals between focal adhesions and the mitotic spindle, this initiating cell proliferation.</li> <li>• Role in integrin beta-1 signaling in B- and T-cells.</li> <li>• TGF-<math>\beta</math> target gene.</li> <li>• Promotes oncogenic signaling and a stem/mesenchymal gene signature in ovarian cancer.</li> </ul> | cell motility<br>proliferation<br>TGF- $\beta$<br>cancer<br>EMT (?) | Immunity 2006, 25:907<br>PLoS One. 2016;11(6): e0157992.<br>Oncogene 2018, 37: 4854 |
| PPP1R14C | Protein phosphatase 1, regulatory subunit 14C                     | 3.58 $\uparrow$ | <ul style="list-style-type: none"> <li>• Modulates capabolic response of osteoblasts.</li> <li>• Upregulated in triple-negative breast cancer.</li> <li>• Might regulate TGF-<math>\beta</math> signaling.</li> </ul>                                                                                                                                                                                                                                                                          | metabolism<br>cancer<br>TGF- $\beta$                                | EBioMedicine 9, 2016: 45<br>Biochem J. 2010;430(2):191                              |
| FOXQ1    | Foxhead box Q1                                                    | 3.53 $\uparrow$ | <ul style="list-style-type: none"> <li>• Regulates including cell proliferation, differentiation and development, especially tumor proliferation.</li> <li>• Overexpression delayed cellular senescence in human fibroblasts.</li> <li>• Mediates the crosstalk between TGF-<math>\beta</math> and Wnt signaling pathways.</li> </ul>                                                                                                                                                          | proliferation<br>cancer<br>TGF- $\beta$                             | Cell Death & Disease 2017, 8:2946<br>Cancer Biol Ther 2015;16(7):1099               |
| CDH6     | Cadherin 6                                                        | 3.46 $\uparrow$ | <ul style="list-style-type: none"> <li>• Cell adhesion molecule involved in renal cancer.</li> <li>• Target in TGF-<math>\beta</math> signalling pathway.</li> </ul>                                                                                                                                                                                                                                                                                                                           | cell motility<br>cancer<br>TGF- $\beta$                             | Cancer Res. 1997, 57(13):2741<br>PLoS One 2013,12;8(9): e75489                      |
| RASD1    | RAS, dexamethasone-induced 1                                      | 3,41 $\uparrow$ | <ul style="list-style-type: none"> <li>• Can activate G proteins in a receptor-independent manner and inhibits signal transduction through different G protein-coupled receptors.</li> <li>• Pivotal role in maintaining the equilibrium between adipogenesis and osteogenesis.</li> <li>• Overexpression of RASD1 inhibits glioma cell migration/invasion.</li> </ul>                                                                                                                         | Metabolism<br>cancer<br>cell motility                               | Metabolism 2020, 108: 154250<br>Scientific Reports 2017, 7, Art.No.: 320            |
| F2RL1    | Coagulation factor 2 receptor like 1                              | 3,25 $\uparrow$ | <ul style="list-style-type: none"> <li>• Promotes TGF-<math>\beta</math> dependent cell motility in pancreatic cancer cells.</li> </ul>                                                                                                                                                                                                                                                                                                                                                        | cell motility<br>cancer<br>TGF- $\beta$                             | Oncotarget. 2016, 7(27):41095                                                       |
| SYTL5    | synaptotagmin-like 5                                              | 3.22 $\uparrow$ | <ul style="list-style-type: none"> <li>• Rab effector protein.</li> <li>• Binds phospholipids in neuroendocrine cells.</li> <li>• Regulates exocytosis.</li> <li>• Involved in EMT processes in NSCLC.</li> </ul>                                                                                                                                                                                                                                                                              | cancer<br>EMT<br>proliferation<br>cell motility                     | NextProt, Madame Curie Bioscience Database<br>EBioMedicine 2019, 46: 42-53          |

|        |                                                                                                 |        |                                                                                                                                                                                                                                                                                                                                                                                               |                                                        |                                                                                                                    |
|--------|-------------------------------------------------------------------------------------------------|--------|-----------------------------------------------------------------------------------------------------------------------------------------------------------------------------------------------------------------------------------------------------------------------------------------------------------------------------------------------------------------------------------------------|--------------------------------------------------------|--------------------------------------------------------------------------------------------------------------------|
|        |                                                                                                 |        | <ul style="list-style-type: none"> <li>• Promotes proliferation, invasion, and metastasis and inhibited cell <u>apoptosis</u> of NSCLC cells.</li> </ul>                                                                                                                                                                                                                                      |                                                        |                                                                                                                    |
| DHRS2  | dehydrogenase/reductase (SDR family) member 2                                                   | 3.22 ↑ | <ul style="list-style-type: none"> <li>• Mitochondrial gene.</li> <li>• Involved in energy generation processes.</li> <li>• Closely associated with the inhibition of cell proliferation, migration and quiescence in cancers.</li> </ul>                                                                                                                                                     | metabolism<br>cancer<br>proliferation<br>cell motility | UniProt<br>J Exp Clin Cancer Res 2019, 38, Art. No.: 30                                                            |
| IFIH1  | Inferferon induced with helicase C domain 1                                                     | 3,20 ↑ | <ul style="list-style-type: none"> <li>• Involved in virus-induced autoimmune diabetes type II</li> </ul>                                                                                                                                                                                                                                                                                     | metabolism                                             | Arq Bras Endocrinol Metabol 2013, 57(9):667                                                                        |
| WNT5B  | wingless-type MMTV integration site family, member 5B                                           | 3.16 ↑ | <ul style="list-style-type: none"> <li>• Supresses Smad2/3 activation.</li> <li>• Regulates canonical and non-canonical Wnt-pathway during adipositas and diabetes type II.</li> </ul>                                                                                                                                                                                                        | metabolism<br>TGF-β                                    | J Diab Invest 2020, 11(2): 307<br>Signal Transduction 2010, 285 (18): 14031<br>J Diabetes Investig 2020,11(2): 307 |
| MGP    | matrix Gla protein                                                                              | 3.14 ↑ | <ul style="list-style-type: none"> <li>• Highly expressed by vascular smooth muscle cells (VSMCs).</li> <li>• Lack of MGP causes vascular abnormalities.</li> <li>• Might contribute to breast cancer resistance mechanism by augmenting the interaction of cells with ECM components.</li> </ul>                                                                                             | Angiogenesis<br>cell motility (?)                      | Curr Med Chem 2020, 27(10):1647<br>Angiogenesis 2016, 19: 1<br>Int. J. Mol. Sci. 2018, 19: 2901                    |
| ZNF365 | Zinc finger protein 365                                                                         | 3.13 ↑ | <ul style="list-style-type: none"> <li>• Maternal LPS-binding protein.</li> <li>• Downregulation associated with poor prognosis in colon cancer.</li> <li>• Overexpressed in TGF-β mediated pulmonary fibrosis</li> </ul>                                                                                                                                                                     | Cancer<br>TGF-β                                        | FASEB 2018, 31 (2): 979<br>Oncol Lett. 2020;20(4):85<br>FASEB 2020, 34 (S1, Exp. Biology): 1                       |
| CLDN14 | Claudin 14                                                                                      | 3.08 ↑ | <ul style="list-style-type: none"> <li>• Extracellular calcium metabolism</li> <li>• Cell adhesion molecule, upregulated in gastric cancer.</li> <li>• Part of endothelial tight junctions</li> </ul>                                                                                                                                                                                         | cell motility<br>proliferation<br>cancer<br>BBB (?)    | JASN 2014,25 (4) 745<br>Diagnostic Pathology 2013, 8: Art. No.: 205<br>Tissue Barriers. 2013;1(3): e24782          |
| HAS2   | hyaluronan synthase 2                                                                           | 3.07 ↑ | <ul style="list-style-type: none"> <li>• Responsible for the synthesis and deposition of hyaluronan in the ECM.</li> <li>• Overexpression of HAS2 lin renal epithelial tip cells led to enhanced cell migration.</li> <li>• Silencing of HAS2 suppresses the malignant phenotype of invasive breast cancer cells.</li> <li>• TGFβ-induced EMT depends on hyaluronan synthase HAS2.</li> </ul> | cell motility<br>cancer<br>EMT<br>TGF-β                | JASN June 2006, 17 (6):1553<br>Int J Cancer 2007, 120(12): 2557<br>Oncogene 2013,32(37): 435                       |
| KCNN4  | K <sup>+</sup> intermediate /small conductance calcium-activated channel, subfamily N, member 4 | 3.06 ↑ | <ul style="list-style-type: none"> <li>• Forms a voltage-independent potassium channel</li> <li>• Promotes invasion and metastasis through MAPK/ERK.</li> <li>• Targeted inhibition of KCa3.1 attenuates TGF-β-induced reactive astrogliosis.</li> </ul>                                                                                                                                      | cell motility<br>TGF-β                                 | J Investig Med. 2020, 68(1):68<br>J Neurochem 2014, 130(1): 41                                                     |

|            |                                                                 |        |                                                                                                                                                                                                                                                                                                             |                                                         |                                                                                                                                                                           |
|------------|-----------------------------------------------------------------|--------|-------------------------------------------------------------------------------------------------------------------------------------------------------------------------------------------------------------------------------------------------------------------------------------------------------------|---------------------------------------------------------|---------------------------------------------------------------------------------------------------------------------------------------------------------------------------|
| HECW2      | HECT, C2 and WW domain containing E3 ubiquitin protein ligase 2 | 3.06 ↑ | <ul style="list-style-type: none"> <li>Ubiquitin ligase.</li> <li>Stabilises p73</li> <li>promotes endothelial cell junctions</li> </ul>                                                                                                                                                                    | BBB (?)                                                 | J Med Genet. 2017;54(2):84<br>Cellular Signalling 2016, 28: 1642                                                                                                          |
| SLC46A3    | solute carrier family 46, member 3                              | 3.05 ↑ | <ul style="list-style-type: none"> <li>Involved in plasma membrane electron transport.</li> <li>Plasma membrane analog of the mitochondrial electron transport chain.</li> </ul>                                                                                                                            | metabolism                                              | Current Molecular Med 2006. 6 (8): 895                                                                                                                                    |
| GPR68      | G protein-coupled receptor 68                                   | 2.95 ↑ | <ul style="list-style-type: none"> <li>Involved in pH homeostasis.</li> <li>Modulates intestinal inflammation and fibrosis.</li> <li>Mediates the interaction of cancer-associated fibroblasts and cancer cells</li> <li>Expression regulated by TGF-β</li> <li>Indirectly influences glycolysis</li> </ul> | cancer<br>TGF-β<br>metabolism                           | Inflamm Intest Dis 2021;6:140<br>FASEB J. 2018, 32(3):1170<br>J Immunol May 1, 2020, 204 (1 Supplement) 76.22<br>BBA - Molecular Basis of Disease 2019, 1865 (12): 165537 |
| STK38L     | serine/threonine kinase 38 like                                 | 2.87 ↑ | <ul style="list-style-type: none"> <li>Ablation promotes loss of cell viability in a subset of KRAS-dependent PCC.</li> </ul>                                                                                                                                                                               | cancer                                                  | Oncotarget 2017,8(45):78556                                                                                                                                               |
| PMEPA1     | prostate transmembrane protein, androgen induced 1              | 2,83 ↑ | <ul style="list-style-type: none"> <li>Suppresses the aTGF-β signaling pathways through interactions with Smad proteins.</li> <li>Overexpression of this gene may play a role in multiple types of cancer.</li> </ul>                                                                                       | TGF-β<br>proliferation<br>cell motility<br>cancer       | PMEPA1 prostate transmembrane protein, androgen induced 1 [Homo sapiens (human)] - Gene - NCBI (nih.gov)                                                                  |
| ITGB3/CD61 | integrin, beta 3 (platelet glycoprotein IIIa, antigen CD61)     | 2.83 ↑ | <ul style="list-style-type: none"> <li>Associated with the risk of human cancers.</li> <li>Key regulator in reactive oxygen species-induced migration and invasion of CRC.</li> <li>In breast cancer cells enhances TGF-β signaling.</li> <li>Facilitates EMT and angiogenesis.</li> </ul>                  | cancer<br>cell motility<br>TGF-β<br>EMT<br>angiogenesis | Mol Cell Proteomics. 2011;10(10): M110.005397<br>Oncotarget. 2017;8(70):114856<br>Am J Transl Res. 2019;11(12):7195                                                       |
| RGS9       | regulator of G-protein signaling 9                              | 2,82 ↑ | <ul style="list-style-type: none"> <li>Increases GTPase activity of G protein alpha subunits.</li> </ul>                                                                                                                                                                                                    |                                                         | RGS9 regulator of G protein signaling 9 [Homo sapiens (human)] - Gene - NCBI (nih.gov)                                                                                    |
| SLC19A2    | solute carrier family 19 (thiamine transporter), member 2       | 2.80 ↑ | <ul style="list-style-type: none"> <li>Thiamine transporter.</li> <li>Upregulation in stem cell like cancer cells of NPCC contributes to enhanced glycolysis.</li> </ul>                                                                                                                                    | cancer (?)<br>metabolism                                | Int J Radiation Oncoll Bio Physics 2016,96 (2) Suppl. E582                                                                                                                |
| SKIL       | SKI-like oncogene                                               | 2.77 ↑ | <ul style="list-style-type: none"> <li>component of the SMAD pathway, which regulates cell growth and differentiation through TGF-β</li> <li>involved in EMT processes.</li> </ul>                                                                                                                          | TGF-β<br>cancer<br>EMT                                  | SKIL SKI like proto-oncogene [Homo sapiens (human)] - Gene - NCBI (nih.gov)<br>Cell Death Differ 2021,28(1):267                                                           |
| MFSD7      | major facilitator superfamily domain containing 7               | 2.77 ↑ | <ul style="list-style-type: none"> <li>Predicted to enable transmembrane transporter activity.</li> <li>Predicted to be involved in transmembrane transport.</li> </ul>                                                                                                                                     |                                                         | SLC49A3 Gene - GeneCard                                                                                                                                                   |
| MYO1D      | myosin ID                                                       | 2.75 ↑ | <ul style="list-style-type: none"> <li>Evolutionarily conserved regulator of animal left-right asymmetry.</li> </ul>                                                                                                                                                                                        | cancer<br>TGF-β                                         | Nat Commun. 2018;9(1):1942.<br>Oncogene 2019, 38:7416<br>Int J Mol Sci. 2019;20(16):3913.                                                                                 |

|            |                                                                |                 |                                                                                                                                                                                                                                                                                                                                                                                                          |                                                                        |                                                                                                                      |
|------------|----------------------------------------------------------------|-----------------|----------------------------------------------------------------------------------------------------------------------------------------------------------------------------------------------------------------------------------------------------------------------------------------------------------------------------------------------------------------------------------------------------------|------------------------------------------------------------------------|----------------------------------------------------------------------------------------------------------------------|
|            |                                                                |                 | <ul style="list-style-type: none"> <li>• Overexpressed MYO1D promotes colorectal tumor progression through upregulating the EGFR in the plasma membrane.</li> <li>• Might regulate TGF-<math>\beta</math> receptor trafficking</li> </ul>                                                                                                                                                                |                                                                        |                                                                                                                      |
| NEBL       | nebulette                                                      | 2.74 $\uparrow$ | <ul style="list-style-type: none"> <li>• cardiac-specific isoform of nebulin family proteins.</li> <li>• Regulates stability and length of actin thin filaments.</li> <li>• New susceptibility gene for endocardial fibroelastosis.</li> </ul>                                                                                                                                                           | vessel dilatation (?)                                                  | J Am Coll Cardiol. 2010, 56 (18) 1493                                                                                |
| PRG4       | proteoglycan 4                                                 | 2.73 $\uparrow$ | <ul style="list-style-type: none"> <li>• Codes for lubricin.</li> <li>• Protects cartilage surface from protein deposition and cell adhesion.</li> <li>• Close analog to vitronectin.</li> <li>• Putative role in cell-cell and cell-ECM interactions.</li> <li>• TGF-<math>\beta</math> regulates PRG expression in vascular smooth muscle cells.</li> <li>• Involved in tumor angiogenesis.</li> </ul> | cell motility (?)<br>TGF- $\beta$<br>angiogenesis                      | J Diabetes 2010, 2(4):233<br>Semin Cancer Biol. 2020;62:1                                                            |
| HEY1       | hes-related family bHLH transcription factor with YRPW motif 1 | 2.73 $\uparrow$ | <ul style="list-style-type: none"> <li>• Basic HLH transcription factor, inhibits myogenesis</li> <li>• Induces cell proliferation in neural stem cells</li> <li>• Upregulated in glioma.</li> <li>• Promotes migration&amp; invasion of melanoma cells</li> </ul>                                                                                                                                       | cancer<br>proliferation<br>cell motility                               | J Cell Mol Med 2009,13(1):136<br>J Cancer. 2021;12(23):6979                                                          |
| CLDN4      | claudin 4                                                      | 2.72 $\uparrow$ | <ul style="list-style-type: none"> <li>• silencing promotes proliferation of gastric cancer cells through activation of PI3K/Akt.</li> <li>• in GBM TGF-<math>\beta</math> mediated upregulation of CLDN4 induces EMT.</li> <li>• tight junction protein, expressed in endothelial cells.</li> </ul>                                                                                                     | proliferation<br>cancer<br>cell motility<br>EMT<br>TGF- $\beta$<br>BBB | Exp Physiol 2020,105(6):979<br>Cell Death & Disease 2022,13, Art.No.: 339<br>Neoplasia 2012,14: 974                  |
| AC002454.1 | LncRNA                                                         | 2.70 $\uparrow$ | <ul style="list-style-type: none"> <li>• AC002454.1 and CDK6 synergistically promote endometrial cell migration and invasion in endometriosis.</li> </ul>                                                                                                                                                                                                                                                | cell motility                                                          | Reproduction 2019,157(6):535                                                                                         |
| WNT2       | wingless-type MMTV integration site family member 2            | 2.70 $\uparrow$ | <ul style="list-style-type: none"> <li>• Autocrine WNT2 signaling in fibroblasts promotes colorectal cancer progression.</li> <li>• Cooperates with TGF-<math>\beta</math> signaling.</li> <li>• Increases tumor angiogenesis in colon cancer.</li> </ul>                                                                                                                                                | Cancer<br>TGF- $\beta$<br>angiogenesis                                 | Oncogene 2017, 36: 5460<br>Angiogenesis 2020, 23: 159                                                                |
| REPS2      | RALBP1 associated Eps domain containing 2                      | 2.64 $\uparrow$ | <ul style="list-style-type: none"> <li>• Regulates the endocytosis of growth factor receptors (downregulated in cancer cells)</li> </ul>                                                                                                                                                                                                                                                                 | cancer                                                                 | Asian Pac J Cancer Prev 2013, 14(5):2851                                                                             |
| TPM1       | tropomyosin 1 (alpha)                                          | 2.63 $\uparrow$ | <ul style="list-style-type: none"> <li>• Functions as a tumor suppressor (proliferation, angiogenesis &amp;, metastasis) in renal cell carcinoma.</li> <li>• Expression regulated by TGF-<math>\beta</math>.</li> <li>• Cell elasticity is regulated by the tropomyosin isoform composition of the actin cytoskeleton.</li> </ul>                                                                        | cancer<br>proliferation<br>cell motility                               | J Cancer. 2019;10(10): 2220<br>J Cell Mol Med 2017, 21(5): 916<br>PlosOne 2015, doi.org/10.1371/journal.pone.0126214 |

|              |                                                            |        |                                                                                                                                                                                                                                                                                                                                                                                                                                                                                                                                                  |                                                                        |                                                                                                                                   |
|--------------|------------------------------------------------------------|--------|--------------------------------------------------------------------------------------------------------------------------------------------------------------------------------------------------------------------------------------------------------------------------------------------------------------------------------------------------------------------------------------------------------------------------------------------------------------------------------------------------------------------------------------------------|------------------------------------------------------------------------|-----------------------------------------------------------------------------------------------------------------------------------|
| PPP1R13L     | protein phosphatase 1, regulatory subunit 13 like          | 2.63 ↑ | <ul style="list-style-type: none"> <li>• Encodes the inhibitor of apoptosis-stimulating protein of p53 protein (iASPP).</li> <li>• Causes paediatric dilated cardiomyopathy.</li> <li>• Acts as a regulator of desmosomes.</li> <li>• Has been implicated in inflammatory pathways.</li> <li>• iASPP is essential for HIF-1alpha stabilization to promote angiogenesis and glycolysis via attenuating VHL-mediated protein degradation.</li> <li>• Downregulation of iASPP expression suppresses proliferation and invasion of HNSCC.</li> </ul> | angiogenesis<br>metabolism<br>cancer<br>cell motility<br>proliferation | Clin Genet 2020, 98(4):331<br>Oncogene 2022, 41: 1944<br>Chin Med Sci J 2019, 34(3):184                                           |
| STK17B       | serine/threonine kinase 17b                                | 2.63 ↑ | <ul style="list-style-type: none"> <li>• promotes carcinogenesis and metastasis via AKT/GSK-3β/SNAIL signaling in HCC.</li> </ul>                                                                                                                                                                                                                                                                                                                                                                                                                | cancer<br>EMT<br>cell motility                                         | Cell Death & Disease 2018, 9, Art.No.: 236                                                                                        |
| CDH2         | cadherin 2, type 1, N-cadherin (neuronal)                  | 2.62 ↑ | <ul style="list-style-type: none"> <li>• E-Cadherin to N-Cadherin switch in EMT.</li> </ul>                                                                                                                                                                                                                                                                                                                                                                                                                                                      | EMT<br>cell motility<br>cancer                                         | Cells. 2019;8(10):1118.                                                                                                           |
| CASC15       | cancer susceptibility candidate 15 (non-protein coding)    | 2.61 ↑ | <ul style="list-style-type: none"> <li>• Tumor-Associated Long Non-Coding RNA</li> <li>• Can affect proliferation, invasion and apoptosis of tumors</li> </ul>                                                                                                                                                                                                                                                                                                                                                                                   | proliferation<br>cancer<br>cell motility                               | Curr Pharm Des 2021, 27(1):127                                                                                                    |
| ANKRD44      | ankyrin repeat domain 44                                   | 2.61 ↑ | <ul style="list-style-type: none"> <li>• Putative regulatory subunit of PP6 that may be involved in the recognition of phosphoprotein substrates.</li> </ul>                                                                                                                                                                                                                                                                                                                                                                                     |                                                                        | ANKRD44 - Serine/threonine-protein phosphatase 6 regulatory ankyrin repeat subunit B - Homo sapiens (Human)   UniProtKB   UniProt |
| ADAMTS6      | ADAM metalloproteinase with thrombospondin type 1 motif, 6 | 2.60 ↑ | <ul style="list-style-type: none"> <li>• Suppresses tumor progression via the ERK signaling pathway.</li> <li>• Differentially expressed in brain pericytes, putatively associated to BBB density.</li> </ul>                                                                                                                                                                                                                                                                                                                                    | cancer<br>BBB (?)                                                      | Oncotarget 2016,7(38):61273<br>Cells 2021, 10, 963, doi.org/10.3390/cells10040963                                                 |
| PDGFA        | platelet-derived growth factor alpha polypeptide           | 2.58 ↑ | <ul style="list-style-type: none"> <li>• Activator of the PDGFR-beta who's expression is upregulated in activated pericytes.</li> <li>• essential and autocrine regulator of VEGFR expression in NSCLC.</li> <li>• regulation of cell motility during wound healing.</li> </ul>                                                                                                                                                                                                                                                                  | cancer<br>angiogenesis<br>cell motility                                | Neuropathol Appl Neurobiol 2021, 47(6):768<br>Cancer Res 2005,65(16):7241<br>Cell Physiol Biochem 2010, 25(2-3):279               |
| INSC         | inscuteable homolog (Drosophila)                           | 2.58 ↑ | <ul style="list-style-type: none"> <li>• Involved in spindle orientation during mitosis.</li> <li>• May regulate cell proliferation and differentiation in the developing nervous system.</li> </ul>                                                                                                                                                                                                                                                                                                                                             | Proliferation (?)                                                      | INSC - Protein inscuteable homolog - Homo sapiens (Human)   UniProtKB   UniProt                                                   |
| CRLF1        | cytokine receptor-like factor 1                            | 2.58 ↑ | <ul style="list-style-type: none"> <li>• may have an ability to change the composition of ECM in fibrosis.</li> <li>• positively regulated by TGF-β in the mouse chondrogenic cells.</li> </ul>                                                                                                                                                                                                                                                                                                                                                  | cell motility (?)<br>TGF-β<br>proliferation                            | World J Hepatol. 2012;4(12):356<br>Calcified Tissue Int 2010, 86:47                                                               |
| DNAJB5/Hsc40 | DnaJ (Hsp40) homolog, subfamily B, member 5                | 2.56 ↑ | <ul style="list-style-type: none"> <li>• Involved in the regulation of ROS</li> </ul>                                                                                                                                                                                                                                                                                                                                                                                                                                                            | cancer                                                                 | Antioxid Redox Signal. 2013;18(10):1165                                                                                           |

|         |                                                        |        |                                                                                                                                                                                                                                                                                                          |                                                          |                                                                                                                                                    |
|---------|--------------------------------------------------------|--------|----------------------------------------------------------------------------------------------------------------------------------------------------------------------------------------------------------------------------------------------------------------------------------------------------------|----------------------------------------------------------|----------------------------------------------------------------------------------------------------------------------------------------------------|
| NUAK1   | NUAK family, SNF1-like kinase, 1                       | 2,52 ↑ | <ul style="list-style-type: none"> <li>• Phosphorylates p53 and regulates proliferation.</li> <li>• Cytosolic NUAK1 enhances ATP production by maintaining proper glycolysis and mitochondrial function in cancer cells.</li> <li>• Expression induced by TGF-β.</li> </ul>                              | proliferation<br>cancer<br>metabolism<br>TGF-β           | Oncogene 2011,30(26):2933<br>Front. Oncol., 2020, Sec. Cancer Metabolism, doi.org/10.3389/fonc.2020.01123<br>J Biol Chem 2019,15;294(11):4119      |
| TNFSF11 | tumor necrosis factor (ligand) superfamily, member 11  | 2.51 ↑ | <ul style="list-style-type: none"> <li>• Cytokine that binds to TNFRSF11B/OPG and to TNFRSF11A/RANK.</li> <li>• Osteoclast differentiation and activation factor.</li> </ul>                                                                                                                             |                                                          | TNFSF11 - Tumor necrosis factor ligand superfamily member 11 - Homo sapiens (Human)   UniProtKB   UniProt                                          |
| EDN1    | endothelin 1                                           | 2.51 ↑ | <ul style="list-style-type: none"> <li>• Potent vasoconstrictor peptide produced by vascular endothelial cells.</li> <li>• Elevated plasma concentration in several solid tumors, multiple functions in cancer cells.</li> </ul>                                                                         | cancer<br>proliferation<br>angiogenesis<br>cell motility | Pharmacolog Rev 2016, 68 (2): 357<br>Br J Cancer. 2003;88(2):163.                                                                                  |
| BPGM    | 2,3-bisphosphoglycerate mutase                         | 2.50 ↑ | <ul style="list-style-type: none"> <li>• central part of the <u>Rapoport-Luebering-cycle</u>, a side pathway of glycolysis.</li> <li>• controls the serine pathway flux.</li> </ul>                                                                                                                      | metabolism                                               | Nat Chem Biol 2017,13(10):1081                                                                                                                     |
| VGLL3   | vestigial like 3 (Drosophila)                          | 2.50 ↑ | <ul style="list-style-type: none"> <li>• inhibitor of adipocyte differentiation.</li> <li>• regulates cranial neural crest migration.</li> </ul>                                                                                                                                                         | cell motility<br>differentiation                         | J Lipid Res 2013, 54(2):473<br>Biol Open. 2017;6(10):1528<br>J Cell Mol Med 2022, 26 (9):2686                                                      |
| F3      | coagulation factor III (thromboplastin, tissue factor) | 2.47 ↑ | <ul style="list-style-type: none"> <li>• Enables cells to initiate the blood coagulation cascades.</li> <li>• Participates in many tumour-related processes that contribute to malignant disease progression</li> </ul>                                                                                  | cancer<br>angiogenesis<br>BBB                            | Breast Cancer Res. 2008;10(2):204                                                                                                                  |
| SMAD7   | SMAD family member 7                                   | 2.47 ↑ | <ul style="list-style-type: none"> <li>• Negatively regulates TGF-β signaling</li> </ul>                                                                                                                                                                                                                 | TGF-β<br>cancer                                          | Acta Biochim Biophys Sin 2009;41(4):263                                                                                                            |
| BHLHE40 | basic helix-loop-helix family, member e40              | 2.46 ↑ | <ul style="list-style-type: none"> <li>• confers pro-survival and pro-metastatic phenotype to breast cancer.</li> <li>• overexpression in multiple cell types has been shown to inhibit cell proliferation, migration, or invasion.</li> <li>• Regulates TWIST transcription in cancer cells.</li> </ul> | proliferation<br>cell motility<br>EMT<br>cancer          | Breast Cancer Res 2018, 20, Art.No.: 117<br>Mol Cellular Biol 2015, 35(24): 4096                                                                   |
| DIXDC1  | DIX domain containing 1                                | 2.46 ↑ | <ul style="list-style-type: none"> <li>• Regulate β-catenin stability.</li> <li>• Regulates cell stickyness.</li> </ul>                                                                                                                                                                                  | cell motility<br>cancer                                  | Mol Cell Biol. 1999;19(6):4414<br>medicalxpress.com                                                                                                |
| DGKI    | diacylglycerol kinase, iota                            | 2.45 ↑ | <ul style="list-style-type: none"> <li>• regulates intracellular concentration of diacylglycerol</li> <li>• can mediate growth factors to induce mitosis</li> <li>• overexpressed in cancer</li> </ul>                                                                                                   | cancer<br>proliferation                                  | J Biol Chem. (1998) 273:32746<br>Biochim Biophys Acta. (2000) 1483:199<br>Front. Med., 2020, Sec. Gastroenterology doi.org/10.3389/fmed.2020.00320 |
| PODXL   | podocalyxin-like                                       | 2.42 ↑ | <ul style="list-style-type: none"> <li>• Might be a new prognostic biomarker in various cancers.</li> <li>• In B cell lymphoma promotes cell proliferation, survival, migration, resistance.</li> </ul>                                                                                                  | cancer<br>proliferation<br>cell motility<br>EMT          | BMC Cancer 2020, 20, Art.No.: 620<br>Cancers 2020;12(2):396<br>PLoS One 2011,12;6(4):e18715                                                        |

|         |                                                            |        |                                                                                                                                                                                                                                                                                                            |                                                                          |                                                                                                                                                                                              |
|---------|------------------------------------------------------------|--------|------------------------------------------------------------------------------------------------------------------------------------------------------------------------------------------------------------------------------------------------------------------------------------------------------------|--------------------------------------------------------------------------|----------------------------------------------------------------------------------------------------------------------------------------------------------------------------------------------|
|         |                                                            |        | <ul style="list-style-type: none"> <li>• Requirement of podocalyxin in TGF-beta induced epithelial mesenchymal transition.</li> </ul>                                                                                                                                                                      | TGF-β                                                                    |                                                                                                                                                                                              |
| LTBP2   | latent transforming growth factor beta binding protein 2   | 2.41 ↑ | <ul style="list-style-type: none"> <li>• a major component of arterial tissue.</li> <li>• Modulator of TGF-β activity.</li> <li>• Promotes the migration and invasion of gastric cancer cells</li> <li>• As an angiogenic factor, LTBP2 upregulation elevated the tube formation of HUVECs</li> </ul>      | TGF-β<br>cancer<br>cell motility<br>angiogenesis                         | Int J Oncol. 2018;52(6):1886<br>Mol Cell Endocrinology, 2022, 550: 111647,                                                                                                                   |
| TNS1    | tensin 1                                                   | 2.41 ↑ | <ul style="list-style-type: none"> <li>• localizes to focal adhesions.</li> <li>• may promote EMT and cancer cell metastasis.</li> <li>• Plays an essential role in TGF-β-induced myofibroblast differentiation and myofibroblast-mediated formation of extracellular fibronectin and collagen.</li> </ul> | EMT<br>Cancer<br>TGF-β<br>cell motility (?)                              | Arch Med Sci 2020,<br>doi.org/10.5114/aoms/127085<br>Am J Respir Cell Mol Biol 2017, 56(4):465                                                                                               |
| RASGRP3 | RAS guanyl releasing protein 3 (calcium and DAG-regulated) | 2.38 ↑ | <ul style="list-style-type: none"> <li>• Controls cell proliferation and migration in cancer</li> </ul>                                                                                                                                                                                                    | cancer<br>cell motility                                                  | Gene 2017,633:35<br>Clin Exp Pharmacol Physiol 2018,45(7):720                                                                                                                                |
| XYLT1   | xylosyltransferase I                                       | 2.38 ↑ | <ul style="list-style-type: none"> <li>• XYLT1 is actively regulated by TGF-β.</li> <li>• Initiates glycosaminoglycan synthesis</li> </ul>                                                                                                                                                                 | metabolism (?)<br>TGF-β                                                  | Thesis: The regulation of XYLT1, the enzyme initiating glycosaminoglycan synthesis; An in vitro study with human immortalized fibroblasts with integrated reporter plasmid (uni-muenchen.de) |
| JUNB    | jun B proto-oncogene                                       | 2.35 ↑ | <ul style="list-style-type: none"> <li>• governs a feed-forward network of TGF-β signaling that aggravates breast cancer invasion.</li> <li>• Stimulates proliferation.</li> </ul>                                                                                                                         | cell motility<br>cancer<br>TGF-β<br>proliferation                        | JunB proto-oncogene-NCBI (nih.gov)<br>The EMBO Journal (2002)21:4104                                                                                                                         |
| NEK7    | NIMA-related kinase 7                                      | 2.34 ↑ | <ul style="list-style-type: none"> <li>• Regulation of mitosis</li> <li>• activation of the NLRP3 inflammasome</li> </ul>                                                                                                                                                                                  | proliferation<br>inflammation                                            | Genome Res. 2003, 13: 1366<br>Nat. Immunol. 2016, 17: 250                                                                                                                                    |
| GPR115  | G protein-coupled receptor 115                             | 2.33 ↑ | <ul style="list-style-type: none"> <li>• Contributes to lung adenocarcinoma metastasis.</li> <li>• Involved in processes of proliferation, migration, invasion and angiogenesis</li> </ul>                                                                                                                 | cancer<br>proliferation<br>cell motility<br>angiogenesis                 | Front. Oncol., 2020, Sec. Molecular and Cellular Oncology doi.org/10.3389/fonc.2020.577530                                                                                                   |
| TGFBR1  | transforming growth factor, beta receptor 1                | 2.29 ↑ | <ul style="list-style-type: none"> <li>• Receptor for TGF-β.</li> <li>• If activated induces EMT, cell motility and proliferation of pericytes.</li> <li>• Controls angiogenesis by two unique TGFBR1 signaling pathways.</li> </ul>                                                                       | cell motility<br>TGF-β<br>proliferation<br>EMT<br>Cancer<br>angiogenesis | Neuropathol Appl Neurobiol 2021, 47(6):768<br>Histol Histopathol 2011,26(9):1219                                                                                                             |
| TMEM2   | transmembrane protein 2                                    | 2.24 ↑ | <ul style="list-style-type: none"> <li>• Expression induced by TGF-β.</li> <li>• Hyaluronidase</li> <li>• Predicts poor prognosis in PDAC.</li> </ul>                                                                                                                                                      | TGF-β<br>cancer<br>cell motility                                         | Biochem Biophys Res Commun 2018, 505(1):74<br>Pancreatology 2020,20(7):1479                                                                                                                  |

|          |                                                       |        |                                                                                                                                                                                                                                                                                                                                                                                                                   |                                                       |                                                                                                                                                      |
|----------|-------------------------------------------------------|--------|-------------------------------------------------------------------------------------------------------------------------------------------------------------------------------------------------------------------------------------------------------------------------------------------------------------------------------------------------------------------------------------------------------------------|-------------------------------------------------------|------------------------------------------------------------------------------------------------------------------------------------------------------|
|          |                                                       |        | <ul style="list-style-type: none"> <li>Regulates cell adhesion and migration via degradation of hyaluronan at focal adhesion sites.</li> </ul>                                                                                                                                                                                                                                                                    |                                                       | J Biol Chem 2021;296:100481                                                                                                                          |
| SRRM3    | serine/arginine repetitive matrix 3                   | 2.24 ↑ | <ul style="list-style-type: none"> <li>RNA splicing factor.</li> <li>Associated with cancer.</li> </ul>                                                                                                                                                                                                                                                                                                           | cancer                                                | Cancer Res 2021;81(18):4736                                                                                                                          |
| SYN1     | synapsin I                                            | 2.22 ↑ | <ul style="list-style-type: none"> <li>Mutations may be associated with X-linked disorders with primary neuronal degeneration</li> </ul>                                                                                                                                                                                                                                                                          | neuronal development                                  | BMC Med Genomics 2021;14(1):182                                                                                                                      |
| WNT9A    | wingless-type MMTV integration site family, member 9A | 2.21 ↑ | <ul style="list-style-type: none"> <li>Induction linked to suppression of human colorectal cancer cell proliferation.</li> </ul>                                                                                                                                                                                                                                                                                  | Cancer proliferation                                  | Int J Mol Sci. 2016;17(4):495.                                                                                                                       |
| TSPAN13  | tetraspanin 13                                        | 2.20 ↑ | <ul style="list-style-type: none"> <li>modulates voltage-gated Cav2.2 Ca<sup>2+</sup> channels.</li> <li>play a role in the regulation of cell development, activation, growth and motility.</li> <li>tumor suppressor.</li> </ul>                                                                                                                                                                                | cell motility<br>cancer proliferation                 | Scientific Reports 2013, 3, Art.No.: 1777<br>Bosn J Basic Med Sci. ,19(2):146                                                                        |
| GREM1    | gremlin 1, DAN family BMP antagonist                  | 2.19 ↑ | <ul style="list-style-type: none"> <li>inhibitor in the TGF-β signaling pathway.</li> <li>expression is found in many cancers.</li> <li>plays a BMP-dependent role.</li> <li>in angiogenesis on endothelium of human lung tissue.</li> </ul>                                                                                                                                                                      | TGF-β<br>cancer angiogenesis                          | BMC Cancer 2006, 6: 74<br>Blood 2007, 109 (5): 1834                                                                                                  |
| SNAI1    | snail family zinc finger 1                            | 2.18 ↑ | <ul style="list-style-type: none"> <li>encodes the SLUG protein</li> <li>induction of EM in human brain pericytes</li> <li>associated with enhanced migration and proliferation of brain pericytes</li> </ul>                                                                                                                                                                                                     | cell motility<br>cancer proliferation<br>TGF-β        | Neuropathol Appl Neurobiol 2021;47(6): 768                                                                                                           |
| VDR      | vitamin D (1,25-dihydroxyvitamin D3) receptor         | 2.18 ↑ | <ul style="list-style-type: none"> <li>VDR signaling enhances adhesion and suppresses the invasive capacity of cells.</li> <li>loss of VDR can lead to abnormal tumor angiogenesis.</li> <li>Required for proliferation, migration, and differentiation of epidermal stem cells and progeny during cutaneous wound repair.</li> <li>Negative regulator of TGF-β/Smad signalling in systemic sclerosis.</li> </ul> | cell motility<br>angiogenesis<br>cancer proliferation | Endocrinol Metab Clin North Am. 2017;46(4):1009<br>Cancer Res. 2009;69(3):967<br>J Invest Dermatol 2018;138(11):2423<br>Ann Rheum Dis 2015;74(3):e20 |
| VAT1L    | vesicle amine transport 1-like                        | 2.17 ↑ | <ul style="list-style-type: none"> <li>Function unknown</li> </ul>                                                                                                                                                                                                                                                                                                                                                |                                                       |                                                                                                                                                      |
| SPDL1    | spindle apparatus coiled-coil protein 1               | 2.14 ↑ | <ul style="list-style-type: none"> <li>Functions in mitotic spindle formation</li> </ul>                                                                                                                                                                                                                                                                                                                          | proliferation<br>cancer                               | Front. Genet 2022, 18 Sec. Compl. Gen. doi.org/10.3389/fgene.2022.79802                                                                              |
| ARHGEF40 | Rho guanine nucleotide exchange factor (GEF) 40       | 2.11 ↑ | <ul style="list-style-type: none"> <li>Rho family GTPases control numerous cellular processes including cytoskeletal reorganization</li> </ul>                                                                                                                                                                                                                                                                    | cell motility (?)                                     | JBC - Mech Signal Transduction 2001, 276(7): 4948                                                                                                    |
| LRRC17   | leucine rich repeat containing 17                     | 2.10 ↑ | <ul style="list-style-type: none"> <li>Anti-apoptotic protein linked to prognosis of ovarian cancer.</li> </ul>                                                                                                                                                                                                                                                                                                   | cancer                                                | Anticancer Res 2020;40(10): 5601                                                                                                                     |
| SLITRK6  | SLIT and NTRK-like family, member 6                   | 2.10 ↑ | <ul style="list-style-type: none"> <li>moderately negatively correlated with tumor malignancy.</li> </ul>                                                                                                                                                                                                                                                                                                         | cancer                                                | Biochem Biophys Rep 2021, 28: 101157                                                                                                                 |

|              |                                                                          |        |                                                                                                                                                                                                                                                                                                                                              |                                                                                  |                                                                                                                            |
|--------------|--------------------------------------------------------------------------|--------|----------------------------------------------------------------------------------------------------------------------------------------------------------------------------------------------------------------------------------------------------------------------------------------------------------------------------------------------|----------------------------------------------------------------------------------|----------------------------------------------------------------------------------------------------------------------------|
| IL21R        | interleukin 21 receptor                                                  | 2.09 ↑ | <ul style="list-style-type: none"> <li>• Transduces the growth promoting signal of IL21.</li> <li>• Controversial functions in cancer</li> <li>• Modulates functions of T, B, natural killer (NK), and myeloid cells.</li> </ul>                                                                                                             | cancer<br>immune surveillance                                                    | Clin Cancer Res 2007, 13 (23): 6926<br>Blood (2007) 109 (10): 4135                                                         |
| RP11-64D22.2 | pseudogene                                                               | 2.09 ↑ | <ul style="list-style-type: none"> <li>• Promotes growth and tumorigenesis of breast cancer</li> </ul>                                                                                                                                                                                                                                       | cancer                                                                           | Molecular Therapy: Nucleic Acids 2020, 21: 916                                                                             |
| TMC7         | transmembrane channel-like 7                                             | 2.08 ↑ | <ul style="list-style-type: none"> <li>• Predicted to enable mechanosensitive ion channel activity. Predicted to be involved in ion transmembrane transport</li> </ul>                                                                                                                                                                       |                                                                                  | TMC7 transmembrane channel like 7 [Homo sapiens (human)] - Gene - NCBI (nih.gov)                                           |
| SPSB1        | spla/ryanodine receptor domain and SOCS box containing 1                 | 2.08 ↑ | <ul style="list-style-type: none"> <li>• Involved in protein ubiquitination and ubiquitin-dependent protein catabolic process</li> <li>• Negative regulator of TGFBR2</li> </ul>                                                                                                                                                             | TGF-β<br>cancer                                                                  | J Biol Chem 2015, 290(29):17894                                                                                            |
| ARHGAP31     | Rho GTPase activating protein 31                                         | 2.07 ↑ | <ul style="list-style-type: none"> <li>• Negative regulator of Rho GTPase</li> </ul>                                                                                                                                                                                                                                                         | cancer                                                                           | J Hematol Oncol 2021,14, Art.No.: 171                                                                                      |
| DAAM1        | dishevelled associated activator of morphogenesis 1                      | 2.06 ↑ | <ul style="list-style-type: none"> <li>• Promotes new actin filaments, regulates cell growth through the stabilization of microtubules.</li> <li>• Overexpression correlates with metastasis in breast cancer.</li> <li>• Activation of DAAM1 leads to inhibition of endothelial cell proliferation, migration, and angiogenesis.</li> </ul> | cancer<br>cell motility<br>angiogenesis                                          | Pathol Res Pract 2020, 216(3):152736<br>PNAS 2010;107(15):6906                                                             |
| SPOCK1       | sparc/osteonectin, cwcv and kazal-like domains proteoglycan (testican) 1 | 2.05 ↑ | <ul style="list-style-type: none"> <li>• Extracellular proteoglycan.</li> <li>• Induces EMT in several cancer cells lines</li> <li>• Promotes migration, degradation of the basement membrane, invasion, adhesion and angiogenesis.</li> <li>• Regulates BBB integrity.</li> </ul>                                                           | cancer<br>EMT<br>TGF- β<br>cell motility<br>proliferation<br>angiogenesis<br>BBB | Biochem. Biophys. Res. Commun. 2013, 440: 792<br>Molecular Cancer 2015,14, Art.No.: 12<br>Cell Physiol 2022, 322 (4): C688 |
| PCDH9        | protocadherin 9                                                          | 2.05 ↑ | <ul style="list-style-type: none"> <li>• acts as a tumor suppressor inducing arrest at G<sub>0</sub>/G<sub>1</sub>, is frequently methylated in HCC</li> <li>• inhibits EMT in cancer</li> </ul>                                                                                                                                             | cancer<br>EMT<br>cell motility                                                   | Mol Med Rep. 2017;16(4):4475<br>Cell Death & Disease 2018, 9, Art. No.: 27                                                 |
| MB21D2       | Mab-21 domain containing 2                                               | 2.04 ↑ | <ul style="list-style-type: none"> <li>• Promotes a pro-oncogenic phenotype in HNSCC.</li> </ul>                                                                                                                                                                                                                                             | cancer<br>proliferation                                                          | Mol Oncol 2020, 14(12):306                                                                                                 |
| RAP1GAP2     | RAP1 GTPase activating protein 2                                         | 2.02 ↑ | <ul style="list-style-type: none"> <li>• GTPase-activating protein that activates the small guanine-nucleotide-binding protein Rap1 in thrombocytes.</li> <li>• Inhibits cytoskeletal remodeling and motility in thyroid cancer cells.</li> </ul>                                                                                            | cancer<br>cell motility                                                          | Endocr Relat Cancer. 2012;19(4):575                                                                                        |
| HS3ST3A1     | heparan sulfate (glucosamine) 3-O-sulfotransferase 3A1                   | 2.01 ↑ | <ul style="list-style-type: none"> <li>• novel tumor regulator and a prognostic marker in breast cancer.</li> </ul>                                                                                                                                                                                                                          | cancer                                                                           | Oncogene, 2016 Sep 22. PMID 27041583                                                                                       |

|           |               |        |                                                                                                  |  |                                                                 |
|-----------|---------------|--------|--------------------------------------------------------------------------------------------------|--|-----------------------------------------------------------------|
| KIAA1549L | KIAA1549-like | 2.01 ↑ | <ul style="list-style-type: none"><li>• Predicted to be integral component of membrane</li></ul> |  | KIAA1549 like [Homo sapiens (human)] -<br>Gene - NCBI (nih.gov) |
|-----------|---------------|--------|--------------------------------------------------------------------------------------------------|--|-----------------------------------------------------------------|
