# Supplementary material for: TGF-beta Modulates the Integrity of the Blood Brain Barrier in Vitro, and is Associated with Metabolic Alterations in Pericytes
Source: Preprints.org preprint supplement (doi:10.20944/preprints202212.0342.v1), 2022-12-20
Supplement: Supplementary file 1 [file supplementary › Suppl Material/Supplementary Table 2.pdf]

**Supplementary Table 2:** Downregulated genes with a log fold change of >2 in TGF- $\beta$  treated HBVP

| Symbol        | Gene Name                                                             | Log fold change | Function                                                                                                                                                                                                                                                                              | Connected to                                   | Reference                                                                             |
|---------------|-----------------------------------------------------------------------|-----------------|---------------------------------------------------------------------------------------------------------------------------------------------------------------------------------------------------------------------------------------------------------------------------------------|------------------------------------------------|---------------------------------------------------------------------------------------|
| RP11-554I8.2  |                                                                       | 3.71 ↓          | Upregulated in bladder cancer                                                                                                                                                                                                                                                         |                                                | Cell Physiol Biochem 2018;50:1154                                                     |
| PPL           | periplakin                                                            | 3.26 ↓          | Adhesion molecule.<br>Links cytoskeletal elements to each other and to the plasma membran.<br>Involved in cellular movement and attachment in cancer.                                                                                                                                 | cell motility                                  | BMC Cell Bio 2011, 12:41                                                              |
| PPARGC1A      | peroxisome proliferator-activated receptor gamma, coactivator 1 alpha | 3.26 ↓          | Transcriptional coactivator of the genes involved in energy metabolism.<br>Master regulator of mitochondrial biogenesis..<br>Pushes muscle fibers to be metabolically more oxidative and less glycolytic<br>Participates in the regulation of both carbohydrate and lipid metabolism. | metabolism                                     | Physiol Rep 2006, 30 (4): 145                                                         |
| IL-1B         | interleukin 1, beta                                                   | 3.24 ↓          | Important role in lipid metabolism<br>Central role in coordinating host immune and proinflammatory responses                                                                                                                                                                          | metabolism                                     | J Exp Med 2003, 198 (6): 877<br>Brain Res Rev. 2009;60(1): 57                         |
| SPRY1         | sprouty homolog 1, antagonist of FGF signaling                        | 2.60 ↓          | Membrane-anchored phosphoprotein inhibitors of growth factor signaling in endothelial cells.<br>Molecular control of endothelial cell behaviour during blood vessel morphogenesis                                                                                                     | angiogenesis                                   | J Cell Bio 2001,152(5):1087<br>Nat Rev Mol Cell Biol. 2011;12(9):551                  |
| CTC-529P8.1   |                                                                       | 2.79 ↓          | Suggested to be involved in angiogenic processes                                                                                                                                                                                                                                      | angiogenesis                                   | <a href="http://angiogenes.uni-frankfurt.de/">http://angiogenes.uni-frankfurt.de/</a> |
| RP11-215G15.5 | lnc RNA                                                               | 2.71 ↓          | Unknown function                                                                                                                                                                                                                                                                      |                                                |                                                                                       |
| TCF21         | transcription factor 21                                               | 2.64 ↓          | Involved in pathogenesis of fibrosis                                                                                                                                                                                                                                                  |                                                | Am J Pathol 2020, 190(1): 145                                                         |
| SDPR          | Serum derivation response                                             | 2.61 ↓          | Required for blood vessel formation (angiogenesis)<br>Required for endothelial cell proliferation, migration and invasion                                                                                                                                                             | angiogenesis<br>cell motility<br>proliferation | J Biol Chem 2017,292 (43): 17760                                                      |
| ZBED3         | zinc finger, BED-type containing 3                                    | 2.55 ↓          | Axin-binding protein that is involved in Wnt/ $\beta$ -catenin signaling modulation                                                                                                                                                                                                   |                                                | JBC 2009, 284, 11: 668                                                                |
| ST3GAL5       | ST3 beta-galactosidase alpha-2,3-sialyltransferase                    | 2.54 ↓          | Downregulation associated with bladder cancer muscle invasion                                                                                                                                                                                                                         | cell motility                                  | Oncol Let 2020, 20(1): 828                                                            |
| AFAP1L2       | actin filament associated protein 1 like 2                            | 2.50 ↓          | Adaptor protein involved in many cellular functions, such as cell survival, cell proliferation, migration, and gene and miRNA expression                                                                                                                                              | cell motility<br>proliferation                 | Scientifica 2014;2014:903014.                                                         |
| IFIT1         | interferon-induced protein with tetratricopeptide repeats 1           | 2.44 ↓          | Involved in immune response and antiviral defense.                                                                                                                                                                                                                                    | cell motility                                  | Cancer Res. 2017, 77 (Suppl. 13):3933.                                                |

|              |                                                             |        |                                                                                                                                                                                                                                                           |                                |                                                                                                                                                                                                                     |
|--------------|-------------------------------------------------------------|--------|-----------------------------------------------------------------------------------------------------------------------------------------------------------------------------------------------------------------------------------------------------------|--------------------------------|---------------------------------------------------------------------------------------------------------------------------------------------------------------------------------------------------------------------|
|              |                                                             |        | overexpression<br>of IFIT1 enhanced EGFR and AKT activation and<br>subsequently promoted OSCC invasion through EMT                                                                                                                                        |                                |                                                                                                                                                                                                                     |
| THBD         | thrombomodulin                                              | 2.36 ↓ | transmembrane <u>glycoprotein</u> located on the luminal surface<br>of <u>endothelial cells</u> in most normal blood vessels.<br>Regulates coagulation and inflammation.<br>Loss of TM is a prominent feature of postradiation<br>endothelial dysfunction | angiogenesis<br>(?)            | Marjan Boerma, in Endothelial Signaling in<br>Vascular Dysfunction and Disease, 2021                                                                                                                                |
| NOV          | nephroblastoma<br>overexpressed                             | 2.34 ↓ | Member of the CCN family of proteins.<br>Expression reaugulted by TGF-β.<br>Provides BMP antagonistic properties                                                                                                                                          |                                | Ann N Y Acad Sci 2007, 1116:50                                                                                                                                                                                      |
| CXADR        | coxsackie virus and<br>adenovirus receptor                  | 2.31 ↓ | Component of the epithelial apical junction complex.<br>Function as a cell adhesion molecule.<br>Essential for tight junction integrity.                                                                                                                  | angiogenesis<br>(?)            | PNAS 2001, 98(26): 15191                                                                                                                                                                                            |
| RP11-38P22.2 | Lnc rNA                                                     | 2.25 ↓ | Suggested to be involved in angiogenic processes                                                                                                                                                                                                          | angiogenesis                   | <a href="http://angiogenes.uni-frankfurt.de/">http://angiogenes.uni-frankfurt.de/</a>                                                                                                                               |
| GABRB1       | gamma-aminobutyric acid<br>(GABA) A receptor, beta 1        | 2.20 ↓ | Inhibitory neurotransmitter for the central nervous system.                                                                                                                                                                                               |                                | GABRB1 gamma-aminobutyric acid type A<br>receptor subunit beta1 [Homo sapiens<br>(human)] - Gene - NCBI (nih.gov)                                                                                                   |
| STAR         | Steroidogenic acute<br>regulatory protein                   | 2.06 ↓ | promote the movement of cholesterol from the outer to the<br>inner mitochondrial membrane                                                                                                                                                                 | metabolism                     | PNAS 1996;93(24):13731                                                                                                                                                                                              |
| LINC00341    | long intergenic non-protein<br>coding RNA 341               | 2.05 ↓ | Exerts anti-inflammatory effect on endothelial cells by<br>repressing VCAM1                                                                                                                                                                               |                                | Physiol Genomics 2017, 49(7): 339                                                                                                                                                                                   |
| TNFRSF1B     | tumor necrosis factor<br>receptor superfamily,<br>member 1B | 2.05 ↓ | Associated with diabetes type 2 kidney disease.<br>critical for the promotion of tumor growth, invasion and<br>metastasis.                                                                                                                                | cell motility                  | TNFRSF1B TNF receptor superfamily<br>member 1B [Homo sapiens (human)] -<br>Gene - NCBI (nih.gov)<br>PlosOne 2014<br><a href="https://doi.org/10.1371/journal.pone.0101138">doi.org/10.1371/journal.pone.0101138</a> |
| ARHGAP29     | Rho GTPase activating protein<br>29                         | 2.00 ↓ | Prognostic factor of proliferation and invasion in prostate<br>cancer.                                                                                                                                                                                    | cell motility<br>proliferatoin | Oncol. Rep. 2020, 44 (6): 2735                                                                                                                                                                                      |
|              |                                                             |        |                                                                                                                                                                                                                                                           |                                |                                                                                                                                                                                                                     |
