# Supplementary material for: TGF-beta Modulates the Integrity of the Blood Brain Barrier in Vitro, and is Associated with Metabolic Alterations in Pericytes
Source: Preprints.org preprint supplement (doi:10.20944/preprints202212.0342.v1), 2022-12-20
Supplement: Supplementary file 1 [file supplementary › Suppl Material/SupplementaryTable_3.pdf]

**Supplementary Table 3: Joint-pathway analysis of metabolomics and RNA sequencing datasets.** Most significantly changed pathways of TGF- $\beta$  vs. control, based on joint-pathway analysis by metabolite concentrations and gene expression fold change, top 14 metabolic pathways.

| Pathway                                                                 | Total | Hits | Raw p    | $-\log_{10}(p)$ | Holm adjust | FDR        | Impact  |
|-------------------------------------------------------------------------|-------|------|----------|-----------------|-------------|------------|---------|
| Glycerolipid metabolism                                                 | 35    | 12   | 1.03E-05 | 4.9891          | 0.00086144  | 0.00086144 | 0.76471 |
| Valine, leucine and isoleucine biosynthesis                             | 12    | 6    | 0.000171 | 3.7665          | 0.014209    | 0.0071902  | 1.3636  |
| Glycerophospholipid metabolism                                          | 86    | 16   | 0.001258 | 2.9004          | 0.10314     | 0.030207   | 0.48235 |
| Amino sugar and nucleotide sugar metabolism                             | 79    | 15   | 0.001438 | 2.8421          | 0.11651     | 0.030207   | 0.61538 |
| Aminoacyl-tRNA biosynthesis                                             | 74    | 14   | 0.002146 | 2.6684          | 0.17165     | 0.034949   | 0.19178 |
| Ascorbate and aldarate metabolism                                       | 13    | 5    | 0.002626 | 2.5807          | 0.20743     | 0.034949   | 0.75    |
| Glycolysis or Gluconeogenesis                                           | 61    | 12   | 0.003155 | 2.501           | 0.24609     | 0.034949   | 0.75    |
| Histidine metabolism                                                    | 32    | 8    | 0.003329 | 2.4778          | 0.25629     | 0.034949   | 0.45161 |
| Alanine, aspartate and glutamate metabolism                             | 61    | 11   | 0.009206 | 2.0359          | 0.69965     | 0.085922   | 0.65    |
| Glycosaminoglycan biosynthesis - chondroitin sulfate / dermatan sulfate | 18    | 5    | 0.012458 | 1.9046          | 0.93435     | 0.10465    | 0.70588 |
| Glutathione metabolism                                                  | 56    | 10   | 0.013718 | 1.8627          | 1           | 0.10476    | 0.8     |
| Phosphatidylinositol signaling system                                   | 74    | 12   | 0.015369 | 1.8133          | 1           | 0.10759    | 0.47945 |
| Glycine, serine and threonine metabolism                                | 68    | 11   | 0.020321 | 1.6921          | 1           | 0.1313     | 0.71642 |
| Phenylalanine metabolism                                                | 21    | 5    | 0.024189 | 1.6164          | 1           | 0.14514    | 0.8     |
